# Supplementary material for: Cortical Mechanisms of Central Fatigue and Sense of Effort
Source: PLoS One. 2016 Feb 9;11(2):e0149026. doi: 10.1371/journal.pone.0149026 (PMC4747526; doi:10.1371/journal.pone.0149026)
Supplement: S1 Table — (XLSX) [file pone.0149026.s004.xlsx]

## Sheet: Table 1
RMT	FatStim	FatNoStim	NoFatStim	NoFatNoStim			PCMT	FatStim	FatNoStim	NoFatStim	NoFatNoStim
					AVG							AVG
sub 1	37	37	36	37	36.75		sub 1	30	30	34	34	32
sub 2	38	37	40	40	38.75		sub 2	33	35	36	33	34.25
sub 3	52	47	48	43	47.5		sub 3	46	46	45	44	45.25
sub 4	38	40	41	43	40.5		sub 4	39	37	39	39	38.5
sub 5	35	37	35	32	34.75		sub 5	32	36	35	33	34
sub 6	44	48	48	48	47		sub 6	43	47	48	46	46
sub 7	45	40	44	43	43		sub 7	43	39	42	39	40.75
sub 8	43	41	40	38	40.5		sub 8	45	43	38	39	41.25
sub 9	34	36	36	35	35.25		sub 9	33	34	34	33	33.5
sub 10	48	53	48	48	49.25		sub 10	46	54	46	48	48.5
sub 11	39	39	38	40	39		sub 11	38	36	36	37	36.75
sub 12	50	48	53	51	50.5		sub 12	46	46	52	49	48.25
AVG	41.9167	41.9167	42.25	41.5	41.8958		AVG	39.5	40.25	40.4167	39.5	39.9167
SD	5.63545	4.41775	4.80384	4.89056	4.54695		SD	6.128	5.7429	4.96368	4.89412	5.21399
rTMS Left RMT	FatStim	FatNoStim	NoFatStim	NoFatNoStim			rTMS Right RMT	FatStim	FatNoStim	NoFatStim	NoFatNoStim
					AVG							AVG
sub 1	40	39	41	43	40.75		sub 1	43	57	43	42	46.25
sub 2	47	45	47	48	46.75		sub 2	46	46	46	50	47
sub 3	55	51	55	51	53		sub 3	54	51	55	51	52.75
sub 4	46	46	46	46	46		sub 4	44	46	45	45	45
sub 5	40	42	40	40	40.5		sub 5	40	42	40	39	40.25
sub 6	53	53	52	54	53		sub 6	53	54	53	55	53.75
sub 7	48	51	50	49	49.5		sub 7	48	51	48	48	48.75
sub 8	49	49	47	44	47.25		sub 8	50	48	45	45	47
sub 9	41	42	41	40	41		sub 9	42	43	45	42	43
sub 10	54	56	56	56	55.5		sub 10	56	58	58	56	57
sub 11	44	37	44	41	41.5		sub 11	44	38	40	43	41.25
sub 12	57	58	53	46.5455	53.6364		sub 12	55	57	47.0909	46.9091	51.5
AVG	47.8333	47.4167	47.6667	46.5455	47.3655		AVG	47.9167	49.25	47.0909	46.9091	47.7917
SD	5.37011	4.83834	5.11952	4.47958	4.78993		SD	4.8619	4.82355	4.97135	5.14087	4.28959
AVG L&R RMT	FatStim	FatNoStim	NoFatStim	NoFatNoStim			90% RMT stim	FatStim	FatNoStim	NoFatStim	NoFatNoStim
							0.9
					AVG							AVG
sub 1	41.5	40	42	41.5	41.25		sub 1	37.35	36	37.8	37.35	36.9
sub 2	46.5	45.5	46.5	49	46.875		sub 2	41.85	40.95	41.85	44.1	41.4
sub 3	54.5	51	55	51	52.875		sub 3	49.05	45.9	49.5	45.9	47.7
sub 4	45	46	45.5	45.5	45.5		sub 4	40.5	41.4	40.95	40.95	41.175
sub 5	40	42	40	39.5	40.375		sub 5	36	37.8	36	35.55	36.9
sub 6	53	53.5	52.5	54.5	53.375		sub 6	47.7	48.15	47.25	49.05	47.7
sub 7	48	51	49	48.5	49.125		sub 7	43.2	45.9	44.1	43.65	45
sub 8	49.5	48.5	46	44.5	47.125		sub 8	44.55	43.65	41.4	40.05	42.525
sub 9	41.5	42.5	43	41	42		sub 9	37.35	38.25	38.7	36.9	38.475
sub 10	55	57	57	56	56.25		sub 10	49.5	51.3	51.3	50.4	51.3
sub 11	44	38.5	42	42	41.625		sub 11	39.6	34.65	37.8	37.8	36.225
sub 12	56	57.5	47.1364	46.6364	51.8182		sub 12	50.4	51.75	42.4227	41.9727	47.0864
AVG	47.875	47.75	47.1364	46.6364	47.3494		AVG	43.0875	42.975	42.4227	41.9727	42.6989
SD	5.06811	4.66828	5.00167	4.9324	4.76405		SD	4.69269	4.34502	4.66224	4.56481	4.40176
