# Supplementary material for: Cortical Mechanisms of Central Fatigue and Sense of Effort
Source: PLoS One. 2016 Feb 9;11(2):e0149026. doi: 10.1371/journal.pone.0149026 (PMC4747526; doi:10.1371/journal.pone.0149026)
Supplement: S2 Table — (XLSX) [file pone.0149026.s005.xlsx]

## Sheet: Table 2
TS1mV	FatStim	FatNoStim	NoFatStim	NoFatNoStim			CCS10	FatStim	FatNoStim	NoFatStim	NoFatNoStim
					AVG							AVG
sub 1	37	35	37	38	36.75		sub 1	58	57	55	57	56.75
sub 2	40	42	40	42	41		sub 2	65	75	73	69	70.5
sub 3	53	54	50	50	51.75		sub 3	70	68	74	67	69.75
sub 4	44	43	44	44	43.75		sub 4	60	63	60	58	60.25
sub 5	35	41	39	36	37.75		sub 5	52	57	55	52	54
sub 6	47	53	53	50	50.75		sub 6	70	75	73	74	73
sub 7	51	47	46	42	46.5		sub 7	65	64	58	56	60.75
sub 8	50	46	44	41	45.25		sub 8	59	65	65	64	63.25
sub 9	36	37	37	37	36.75		sub 9	60	60	65	56	60.25
sub 10	54	75	54	62	61.25		sub 10	76	85	73	85	79.75
sub 11	45	46	48	43	45.5		sub 11	60	70	63	65	64.5
sub 12	56	53	58	56	55.75		sub 12	70	70	69	69	69.5
AVG	45.6667	47.6667	45.8333	45.0833	46.0625		AVG	63.75	67.4167	65.25	64.3333	65.1875
SD	6.5734	6.30721	5.48852	7.0096	5.71844		SD	6.18524	6.96795	8.25025	7.53089	6.88956
