# Supplementary material for: Cortical Mechanisms of Central Fatigue and Sense of Effort
Source: PLoS One. 2016 Feb 9;11(2):e0149026. doi: 10.1371/journal.pone.0149026 (PMC4747526; doi:10.1371/journal.pone.0149026)
Supplement: S3 Fig — (XLSX) [file pone.0149026.s003.xlsx]

## Sheet: Figure 6
Fatigue No Stim				Fatigue Stim
	a1 rate constant			a1 rate constant
A	ICF	a1	1/a1	B	ICF	a1	1/a1
	2.2549	9.70173	0.103074		0.571696	10.1019	0.0989916
	2.0868	50.8146	0.0196794		1.51859	8.60806	0.11617
	1.66144	14.0195	0.0713292		0.960894	5.67483	0.176217
	2.42539	13.7583	0.0726832		0.870886	3.91915	0.255157
	1.86164	35.3638	0.0282775		2.13068	14.9762	0.0667728
	3.17391	34.2233	0.0292198		2.19333	4.54668	0.21994
	1.16641	17.5919	0.0568444		0.394203	2.33939	0.427462
	1.03772	8.00312	0.124951		1.64485	12.7499	0.078432
	0.448598	11.9229	0.0838719		0.648464	5.00189	0.199924
	1.80103	25.6655	0.0389628		2.9608	22.9151	0.0436394
	1.22805	25.1125	0.0398207		2.38227	1.76833	0.565505
	0.909341	47.8401	0.020903		1.29268	1.27385	0.785019
Fatigue No Stim				Fatigue Stim
C	a3 rate contsant			D	a3 rate constant
	ICF	a3	1/a3		ICF	a3	1/a3
	2.2549	13.7099	0.0729398		0.571696	10.5304	0.0949634
	2.0868	19.9234	0.0501922		1.51859	9.086	0.110059
	1.66144	-63.2667	-0.0158061		0.960894	5.69058	0.175729
	2.42539	8.79216	0.113738		0.870886	4.25387	0.23508
	1.86164	64.3952	0.0155291		2.13068	56.8712	0.0175836
	3.17391	6.80575	0.146935		2.19333	31.0775	0.0321776
	1.16641	47.6536	0.0209848		0.394203	17.1572	0.0582847
	1.03772	14.1796	0.0705239		1.64485	12.736	0.0785174
	0.448598	5.58771	0.178964		0.648464	4.98238	0.200707
	1.80103	97.272	0.0102805		2.9608	51.3017	0.0194925
	1.22805	255.482	0.00391417		2.38227	23.1378	0.0432193
	0.909341	36.016	0.0277654		1.29268	34.3566	0.0291065
